# Supplementary material for: Na7(SeO4)3(IO3) and K2(SeO4)[IO2(OH)]: two new iodate-selenates with short-wave UV cutoff edge and large birefringence
Source: Royal Society of Chemistry journal article supplement (doi:10.1039/d3tc01613g), 2023-01-01
Supplement: d3tc01613g1.pdf [file d3tc01613g1.pdf]

Electronic Supporting Information

**Na<sub>7</sub>(SeO<sub>4</sub>)<sub>3</sub>(IO<sub>3</sub>) and K<sub>2</sub>(SeO<sub>4</sub>)[IO<sub>2</sub>(OH)]: Two New Iodate-Selenates with Short-Wave UV Cutoff Edge and Large Birefringence†**

Wen Song,<sup>a</sup> Jinxuan Ren,<sup>a</sup> Jinwen Tan,<sup>a</sup> Liling Cao,<sup>a</sup> Xuehua Dong,<sup>a</sup> Ling Huang,<sup>\*a</sup> Daojiang Gao,<sup>a</sup> and Guohong Zou<sup>\*b</sup>

<sup>a</sup>College of Chemistry and Materials Science, Sichuan Normal University, Chengdu, 610066, P. R. China.

<sup>b</sup>College of Chemistry, Sichuan University, Chengdu, 610065, P. R. China.

E-mail: huangl026@sina.com, zough@scu.edu.cn

## Table of contents

| Sections | Titles                                                                                                                                                                                                                                                      | Pages |
|----------|-------------------------------------------------------------------------------------------------------------------------------------------------------------------------------------------------------------------------------------------------------------|-------|
| Table S1 | Atomic coordinates and equivalent isotropic displacement parameters, and calculated Bond Valence Sum for $\text{Na}_7(\text{SeO}_4)_3(\text{IO}_3)$ . $U_{(\text{eq})}$ is defined as one third of the trace of the orthogonalized $U_{ij}$ tensor.         | S3    |
| Table S2 | Atomic coordinates and equivalent isotropic displacement parameters, and calculated Bond Valence Sum for $\text{K}_2(\text{SeO}_4)[\text{IO}_2(\text{OH})]$ . $U_{(\text{eq})}$ is defined as one third of the trace of the orthogonalized $U_{ij}$ tensor. | S4    |
| Table S3 | Selected bond lengths [ $\text{\AA}$ ] and angles [ $^\circ$ ] for $\text{Na}_7(\text{SeO}_4)_3(\text{IO}_3)$ .                                                                                                                                             | S5    |
| Table S4 | Selected bond lengths [ $\text{\AA}$ ] and angles [ $^\circ$ ] for $\text{K}_2(\text{SeO}_4)[\text{IO}_2(\text{OH})]$ .                                                                                                                                     | S6    |
| Table S5 | Flexibility index $F$ of the anionic group in $\text{Na}_7(\text{SeO}_4)_3(\text{IO}_3)$ .                                                                                                                                                                  | S7    |
| Fig. S1  | (a, b) The bond length of $[\text{SeO}_4]$ and $[\text{IO}_3]$ in $\text{Na}_7(\text{SeO}_4)_3(\text{IO}_3)$ . (c, d) The bond length of $[\text{SeO}_4]$ and $[\text{IO}_2(\text{OH})]$ in $\text{K}_2(\text{SeO}_4)[\text{IO}_2(\text{OH})]$ .            | S8    |
| Fig. S2  | XRD patterns of (a) $\text{Na}_7(\text{SeO}_4)_3(\text{IO}_3)$ and (b) $\text{K}_2(\text{SeO}_4)[\text{IO}_2(\text{OH})]$ .                                                                                                                                 | S8    |
| Fig. S3  | TGA curves for (a) $\text{Na}_7(\text{SeO}_4)_3(\text{IO}_3)$ and (b) $\text{K}_2(\text{SeO}_4)[\text{IO}_2(\text{OH})]$ .                                                                                                                                  | S8    |
| Fig. S4  | XRD patterns of (a) $\text{Na}_7(\text{SeO}_4)_3(\text{IO}_3)$ and (b) $\text{K}_2(\text{SeO}_4)[\text{IO}_2(\text{OH})]$ after melting.                                                                                                                    | S9    |
| Fig. S5  | IR spectra of (a) $\text{Na}_7(\text{SeO}_4)_3(\text{IO}_3)$ and (b) $\text{K}_2(\text{SeO}_4)[\text{IO}_2(\text{OH})]$ .                                                                                                                                   | S9    |
| Fig. S6  | Calculated band gaps of (a) $\text{Na}_7(\text{SeO}_4)_3(\text{IO}_3)$ and (b) $\text{K}_2(\text{SeO}_4)[\text{IO}_2(\text{OH})]$ .                                                                                                                         | S9    |

**Table S1.** Atomic coordinates and equivalent isotropic displacement parameters, and calculated Bond Valence Sum for  $\text{Na}_7(\text{SeO}_4)_3(\text{IO}_3)$ .  $U_{\text{eq}}$  is defined as one third of the trace of the orthogonalized  $U_{ij}$  tensor.

| atom | x           | y             | z            | $U_{\text{eq}}(\text{\AA}^2)$ | BVS  |
|------|-------------|---------------|--------------|-------------------------------|------|
| I1   | 0.91973 (4) | 0.49222 (3)   | 0.92516 (2)  | 0.01056 (8)                   | 5.19 |
| Se1  | 0.2526 (7)  | 0.24405 (4)   | 0.83448 (3)  | 0.00939 (11)                  | 6.03 |
| Se2  | 0.7561 (7)  | -0.00168 (5)  | 0.91219 (2)  | 0.01163 (10)                  | 6.08 |
| Se3  | 0.73716 (7) | 0.21051 (4)   | 0.66291 (3)  | 0.00929 (11)                  | 6.11 |
| Na1  | 0.10054 (3) | -0.0241 (2)   | 0.76267 (12) | 0.0166 (5)                    | 1.10 |
| Na2  | 0.5175 (3)  | 0.2802 (2)    | 0.99153 (14) | 0.0187 (6)                    | 1.12 |
| Na3  | 0.7572 (3)  | 0.25162 (18)  | 0.83618 (14) | 0.022 (5)                     | 1.04 |
| Na4  | 0.12654 (3) | -0.03353 (19) | 0.9113 (11)  | 0.0196 (5)                    | 1.08 |
| Na5  | 0.4790 (3)  | 0.2268 (2)    | 0.50558 (14) | 0.0166 (6)                    | 1.17 |
| Na6  | 0.4985 (3)  | -0.0293 (2)   | 0.74706 (14) | 0.0278 (6)                    | 0.96 |
| Na7  | 0.2432 (3)  | 0.2077 (3)    | 0.6672(15)   | 0.0345 (7)                    | 1.02 |
| O1   | 0.7400 (6)  | 0.3367 (3)    | 0.7067 (2)   | 0.021 (9)                     | 2.03 |
| O2   | 0.9229 (6)  | 0.1334 (4)    | 0.6847 (2)   | 0.0205 (9)                    | 1.90 |
| O3   | 0.8075 (5)  | 0.6314 (4)    | 0.9473 (2)   | 0.0166 (9)                    | 2.31 |
| O4   | 0.2539 (6)  | 0.1031 (3)    | 0.8109 (2)   | 0.0178 (8)                    | 2.00 |
| O5   | 0.2292 (6)  | 0.3286 (3)    | 0.7645 (2)   | 0.0188 (8)                    | 2.09 |
| O6   | 0.7430 (6)  | 0.2376 (3)    | 0.5789 (2)   | 0.0177 (8)                    | 2.13 |
| O7   | 0.7411 (6)  | 0.0445 (3)    | 0.83059 (19) | 0.021 (8)                     | 2.09 |
| O8   | 0.8041 (5)  | 0.3948 (4)    | 0.9867 (2)   | 0.0159 (9)                    | 2.22 |
| O9   | 0.5461 (5)  | 0.1388 (4)    | 0.6823 (2)   | 0.0227 (10)                   | 2.09 |
| O10  | 0.4488 (5)  | 0.2796 (4)    | 0.8727 (2)   | 0.0217 (10)                   | 2.05 |
| O11  | 0.5799 (6)  | -0.0900 (4)   | 0.9293 (3)   | 0.0289 (10)                   | 1.93 |
| O12  | 0.746 (6)   | 0.2664 (4)    | 0.8871 (2)   | 0.0179 (9)                    | 1.88 |
| O13  | 0.7980 (5)  | 0.4588 (3)    | 0.8447 (2)   | 0.0147 (8)                    | 2.28 |
| O14  | 0.7517 (6)  | 0.1125 (4)    | 0.9649 (2)   | 0.0265 (9)                    | 1.93 |
| O15  | 0.9503 (5)  | -0.0785 (4)   | 0.9192 (3)   | 0.0293 (11)                   | 1.97 |

**Table S2.** Atomic coordinates and equivalent isotropic displacement parameters, and calculated Bond Valence Sum for  $\text{K}_2(\text{SeO}_4)[\text{IO}_2(\text{OH})]$ .  $U_{\text{eq}}$  is defined as one third of the trace of the orthogonalized  $U_{ij}$  tensor.

| atom | x            | y            | z            | $U_{\text{eq}}(\text{\AA}^2)$ | BVS  |
|------|--------------|--------------|--------------|-------------------------------|------|
| I1   | 0.25022 (3)  | 0.70311 (2)  | 0.75267 (2)  | 0.01152 (7)                   | 5.13 |
| I2   | 0.62148 (3)  | 0.57045 (2)  | 0.8674 (2)   | 0.0127 (7)                    | 5.14 |
| Se1  | 1.01462 (4)  | 0.72353 (2)  | 0.95483 (2)  | 0.01229 (9)                   | 6.06 |
| Se2  | 0.85559 (4)  | 0.53484 (2)  | 0.65537 (2)  | 0.01295 (9)                   | 6.05 |
| K1   | 0.53622 (10) | 0.83013 (6)  | 0.9745 (6)   | 0.02084 (17)                  | 1.07 |
| K2   | 0.72727 (11) | 0.31278 (5)  | 0.78629 (6)  | 0.02042 (17)                  | 1.02 |
| K3   | 1.12705 (11) | 0.44586 (6)  | 0.88573 (6)  | 0.02186 (18)                  | 1.17 |
| K4   | 0.13555 (11) | 0.95395 (6)  | 0.86573 (6)  | 0.02306 (18)                  | 1.07 |
| O1   | 0.4748 (3)   | 0.73486 (17) | 0.7890 (18)  | 0.0176 (5)                    | 2.02 |
| O2   | 0.2993 (3)   | 0.65224 (17) | 0.63247 (17) | 0.0195 (5)                    | 2.60 |
| O3   | 0.5685 (3)   | 0.62757 (18) | 0.9861 (17)  | 0.0212 (5)                    | 2.50 |
| O4   | 0.6959 (3)   | 0.4613 (17)  | 0.91994 (18) | 0.0218 (6)                    | 1.95 |
| O5   | 0.1597 (3)   | 0.81314 (17) | 0.71316 (18) | 0.0207 (5)                    | 2.16 |
| O6   | 0.9105 (4)   | 0.64347 (17) | 0.6775 (2)   | 0.0267 (6)                    | 1.84 |
| O7   | 1.2074 (3)   | 0.75493 (18) | 0.91807 (18) | 0.0209 (6)                    | 2.00 |
| O8   | 0.9723 (3)   | 0.6150 (18)  | 0.9249 (2)   | 0.0245 (6)                    | 1.91 |
| O9   | 0.8629 (4)   | 0.79296 (19) | 0.9069 (19)  | 0.0266 (6)                    | 1.96 |
| O10  | 0.6854 (4)   | 0.50596 (19) | 0.71785 (19) | 0.0259 (6)                    | 2.06 |
| O11  | 0.7955 (4)   | 0.5200 (2)   | 0.54344 (18) | 0.0311 (7)                    | 1.95 |
| O12  | 1.0167 (19)  | 0.46422 (11) | 0.68939 (11) | 0.0302 (7)                    | 1.95 |
| O13  | 0.40016 (19) | 0.53962 (11) | 0.82771 (11) | 0.0189 (5)                    | 2.15 |
| O14  | 1.02499 (19) | 0.73127 (11) | 1.07079 (11) | 0.0209 (6)                    | 1.86 |

**Table S3.** Selected bond lengths [Å] and angles [°] for Na<sub>7</sub>(SeO<sub>4</sub>)<sub>3</sub>(IO<sub>3</sub>).

|                                            |             |                                           |             |
|--------------------------------------------|-------------|-------------------------------------------|-------------|
| Se1—O4                                     | 1.643 (4)   | Na1—O2                                    | 2.380 (5)   |
| Se1—O5                                     | 1.643 (4)   | Na1—O7                                    | 2.411 (4)   |
| Se1—O10                                    | 1.626 (4)   | Na2—O8                                    | 2.416 (4)   |
| Se1—O12                                    | 1.635 (4)   | Na2—O10                                   | 2.311 (5)   |
| Se2—O7                                     | 1.638 (4)   | Na4—O15                                   | 2.308 (5)   |
| Se2—O11                                    | 1.633 (4)   | Na4—O1 <sup>vii</sup>                     | 2.674 (5)   |
| Se2—O14                                    | 1.627 (4)   | Na5—O6                                    | 2.345 (4)   |
| Se2—O15                                    | 1.636 (4)   | Na5—O3 <sup>ix</sup>                      | 2.474 (4)   |
| Se3—O1                                     | 1.642 (4)   | Na6—O4                                    | 2.592 (5)   |
| Se3—O2                                     | 1.635 (4)   | Na6—O7                                    | 2.490 (5)   |
| Se3—O6                                     | 1.626 (4)   | Na6—O9                                    | 2.277 (5)   |
| Se3—O9                                     | 1.625 (4)   | Na7—O4                                    | 2.973 (5)   |
| I1—O3                                      | 1.804 (4)   | Na7—O5                                    | 2.295 (5)   |
| I1—O8                                      | 1.801 (4)   | Na7—O9                                    | 2.312 (5)   |
| I1—O13                                     | 1.797 (4)   | Na7—O2 <sup>vi</sup>                      | 2.454 (5)   |
| Na2 <sup>i</sup> —I1—Na1 <sup>ii</sup>     | 111.83 (6)  | O13—I1—O3                                 | 99.47 (18)  |
| Na3—I1—Na1 <sup>ii</sup>                   | 61.14 (6)   | O5—Se1—O4                                 | 109.6 (2)   |
| Na4 <sup>iv</sup> —I1—Na1 <sup>ii</sup>    | 167.92 (6)  | O15—Na4—O6 <sup>vii</sup>                 | 75.82 (15)  |
| Na5 <sup>iii</sup> —I1—Na1 <sup>ii</sup>   | 115.90 (6)  | O10—Se1—O12                               | 110.9 (2)   |
| Na7 <sup>v</sup> —I1—Na1 <sup>ii</sup>     | 63.31 (7)   | O12—Se1—O5                                | 109.1 (2)   |
| O4 <sup>viii</sup> —Na4—Na1                | 46.45 (11)  | O7—Se2—Na4 <sup>vi</sup>                  | 87.87 (15)  |
| O4 <sup>viii</sup> —Na4—O1 <sup>vii</sup>  | 71.76 (13)  | O11—Se2—O15                               | 108.4 (2)   |
| O6 <sup>vii</sup> —Na4—I1 <sup>i</sup>     | 94.52 (11)  | O14—Se2—O15                               | 112.4 (2)   |
| O6 <sup>vii</sup> —Na4—Se1 <sup>viii</sup> | 158.85 (12) | O15—Se2—O7                                | 107.4 (2)   |
| O6 <sup>vii</sup> —Na4—O1 <sup>vii</sup>   | 61.15 (13)  | O1—Se3—Na7                                | 90.47 (16)  |
| O3—I1—Na1 <sup>ii</sup>                    | 109.85 (14) | O6—Na5—O3 <sup>xi</sup>                   | 74.78 (15)  |
| O3—I1—Na5 <sup>iii</sup>                   | 39.40 (13)  | O2—Na1—O5                                 | 101.79 (16) |
| O8—I1—Na4 <sup>iv</sup>                    | 47.67 (13)  | O9—Na6—O1 <sup>ix</sup>                   | 144.19 (18) |
| O13—I1—Na2 <sup>i</sup>                    | 107.34 (13) | O13 <sup>vii</sup> —Na1—I1 <sup>vii</sup> | 26.97 (8)   |
| O6—Na4—O3 <sup>i</sup>                     | 63.93 (12)  | Na6—O9—Na7                                | 101.78 (17) |
| O8 <sup>i</sup> —Na4—I1 <sup>i</sup>       | 32.17 (9)   | O12 <sup>viii</sup> —Na3—Se3              | 115.90 (12) |
| O8 <sup>i</sup> —Na4—O6 <sup>vii</sup>     | 124.53 (15) | I1—O3—Na4 <sup>iv</sup>                   | 86.25 (16)  |
| O11 <sup>viii</sup> —Na4—I1 <sup>i</sup>   | 65.63 (14)  | I1 <sup>iv</sup> —Na2—Na3 <sup>iv</sup>   | 55.25 (5)   |

Symmetry codes:

(i) 2-x, 1/2+y, 3/2-z; (ii) 1/2+x, 1/2-y, 2-z; (iii) -1/2+x, 1/2-y, 2-z; (iv) 3/2-x, 1-y, 1/2+z; (v) 1-x, 1/2+y, 3/2-z; (vi) -1+x, +y, +z; (vii) 2-x, -1/2+y, 3/2-z; (viii) 1+x, +y, +z; (ix) 1-x, -1/2+y, 3/2-z; (x) 3/2-x, -y, 1/2+z; (xi) 3/2-x, 1-y, -1/2+z; (xii) 3/2-x, -y, -1/2+z; (xiii) 1/2+x, 1/2-y, 1-z; (xiv) -1/2+x, 1/2-y, 1-z.

**Table S4.** Selected bond lengths [Å] and angles [°] for K<sub>2</sub>(SeO<sub>4</sub>)[IO<sub>2</sub>(OH)].

|                                        |              |                                         |             |
|----------------------------------------|--------------|-----------------------------------------|-------------|
| I1—O1                                  | 1.798 (2)    | Se2—O12                                 | 1.6266 (15) |
| I1—O2                                  | 1.905 (2)    | I1—K1                                   | 4.0894 (8)  |
| I1—O5                                  | 1.783 (2)    | I1—K4                                   | 4.0343 (9)  |
| I2—O3                                  | 1.930 (2)    | Se2—K2                                  | 3.8252 (9)  |
| I2—O4                                  | 1.795 (2)    | Se2—K3                                  | 3.9205 (9)  |
| I2—O13                                 | 1.7833 (14)  | Se2—K4 <sup>ii</sup>                    | 3.8885 (9)  |
| Se1—O7                                 | 1.649 (2)    | K3—O4                                   | 3.348 (3)   |
| Se1—O8                                 | 1.628 (3)    | K3—O5 <sup>vii</sup>                    | 2.911 (3)   |
| Se1—O9                                 | 1.625 (3)    | K3—O8 <sup>iv</sup>                     | 2.958 (3)   |
| Se1—O14                                | 1.6339 (15)  | K4—O2 <sup>i</sup>                      | 2.490 (5)   |
| Se2—O6                                 | 1.627 (2)    | K4—O5                                   | 2.277 (5)   |
| Se2—O10                                | 1.668 (2)    | K1—O11 <sup>viii</sup>                  | 3.018 (3)   |
| Se2—O11                                | 1.622 (3)    | K2—O1 <sup>vii</sup>                    | 2.798 (2)   |
| K2 <sup>i</sup> —I1—K1                 | 111.052 (17) | K2—O4                                   | 2.855 (3)   |
| K2 <sup>i</sup> —I1—K4                 | 58.728 (17)  | O14—K3 <sup>iv</sup>                    | 2.8602 (17) |
| O9 <sup>vii</sup> —K2—K3               | 123.37 (6)   | O5 <sup>vii</sup> —K3—I2 <sup>iv</sup>  | 97.97 (6)   |
| O9 <sup>vii</sup> —K2—K4 <sup>ii</sup> | 53.38 (6)    | O5 <sup>vii</sup> —K3—Se1 <sup>iv</sup> | 93.89 (5)   |
| K2 <sup>i</sup> —I1—K4 <sup>ii</sup>   | 120.894 (18) | O3—K1—Se2 <sup>viii</sup>               | 122.30 (5)  |
| K4—I1—K1                               | 54.816 (16)  | O13—I2—K1                               | 99.68 (5)   |
| O1—I1—K1                               | 40.12 (8)    | O7—Se1—K3 <sup>iv</sup>                 | 134.99 (10) |
| O1—I1—O2                               | 95.91 (11)   | O5 <sup>vii</sup> —K3—O4                | 134.07 (7)  |
| O1—I1—O7 <sup>iii</sup>                | 81.19 (10)   | O8—K3—I2 <sup>iv</sup>                  | 93.50 (6)   |
| O2—I1—K4                               | 138.65 (8)   | O12—K3—K2                               | 60.88 (4)   |
| O14 <sup>iv</sup> —K2—O4               | 76.70 (6)    | O13 <sup>v</sup> —K3—I2 <sup>iv</sup>   | 87.94 (4)   |
| K2—I2—K1                               | 174.722 (18) | O6—Se2—K2                               | 139.91 (10) |
| K2—I2—K4 <sup>ii</sup>                 | 58.611 (18)  | O10—Se2—K3                              | 82.06 (10)  |
| K3 <sup>iv</sup> —I2—K1                | 78.521 (18)  | O11—Se2—K2                              | 107.34 (11) |
| K3 <sup>iv</sup> —I2—K2                | 96.209 (18)  | O2 <sup>i</sup> —K4—Se <sup>i</sup>     | 82.65 (5)   |
| K4 <sup>ii</sup> —I2—K1                | 126.458 (17) | O6 <sup>vii</sup> —K2—O10               | 150.59 (8)  |
| O3—K1—K4                               | 123.71 (6)   | Se2—O12—K3                              | 120.20 (7)  |
| O4—I2—K1                               | 133.55 (9)   | O4—K2—Se                                | 75.07 (5)   |
| Se1—O8—K3                              | 143.54 (14)  | Se1—O8—K3                               | 143.54 (14) |

Symmetry codes:

(i) 1/2-x, 1/2+y, 3/2-z; (ii) 1/2-x, -1/2+y, 3/2-z; (iii) -1+x, +y, +z; (iv) 2-x, 1-y, 2-z; (v) 1+x, +y, +z; (vi) 1/2+x, 3/2-y, -1/2+z; (vii) 3/2-x, -1/2+y, 3/2-z; (viii) -1/2+x, 3/2-y, 1/2+z; (ix) 3/2-x, 1/2+y, 3/2-z; (x) 1/2+x, 3/2-y, 1/2+z; (xi) -1/2+x, 3/2-y, -1/2+z.

**Table S5.** Flexibility index  $F$  of the anionic group in  $\text{Na}_7(\text{SeO}_4)_3(\text{IO}_3)$ .

|                 | $R_0$ (Å) | $R_a$ (Å) | $\text{Exp}[(R_0-R_a)/B]$ | $(\sqrt{C_a}+\sqrt{C_b})^2/R_a^2$ | $F$   |
|-----------------|-----------|-----------|---------------------------|-----------------------------------|-------|
| $\text{IO}_3$   | 2.003     | 1.801     | 1.726                     | 8.004                             | 0.216 |
| $\text{Se1O}_4$ | 1.788     | 1.637     | 1.504                     | 8.956                             | 0.168 |
| $\text{Se2O}_4$ | 1.788     | 1.634     | 1.516                     | 8.989                             | 0.169 |
| $\text{Se3O}_4$ | 1.788     | 1.632     | 1.524                     | 9.011                             | 0.169 |

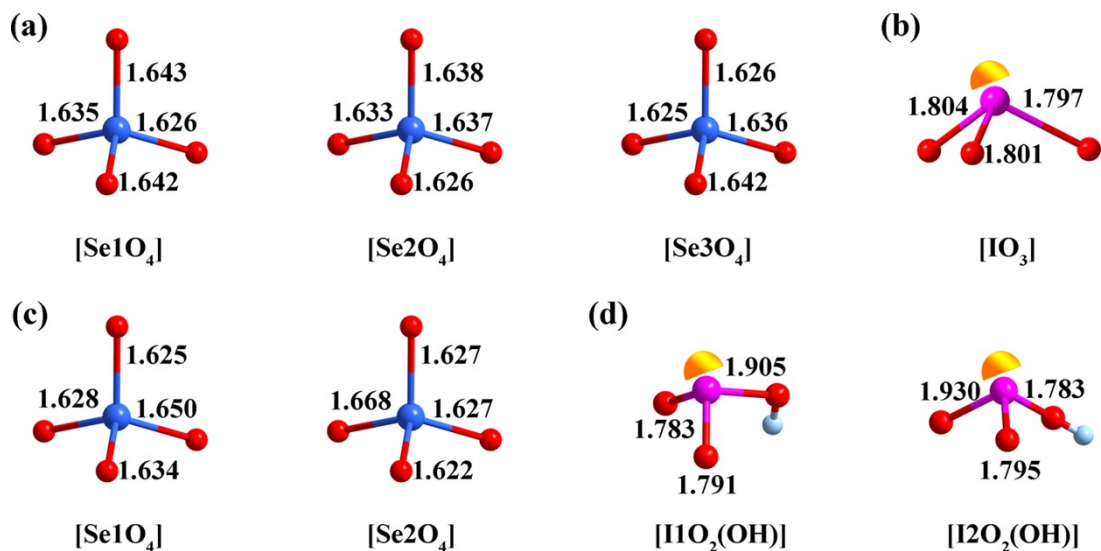

**Fig. S1** (a, b) The bond length of [SeO<sub>4</sub>] and [IO<sub>3</sub>] in Na<sub>7</sub>(SeO<sub>4</sub>)<sub>3</sub>(IO<sub>3</sub>). (c, d) The bond length of [SeO<sub>4</sub>] and [IO<sub>2</sub>(OH)] in K<sub>2</sub>(SeO<sub>4</sub>)[IO<sub>2</sub>(OH)].

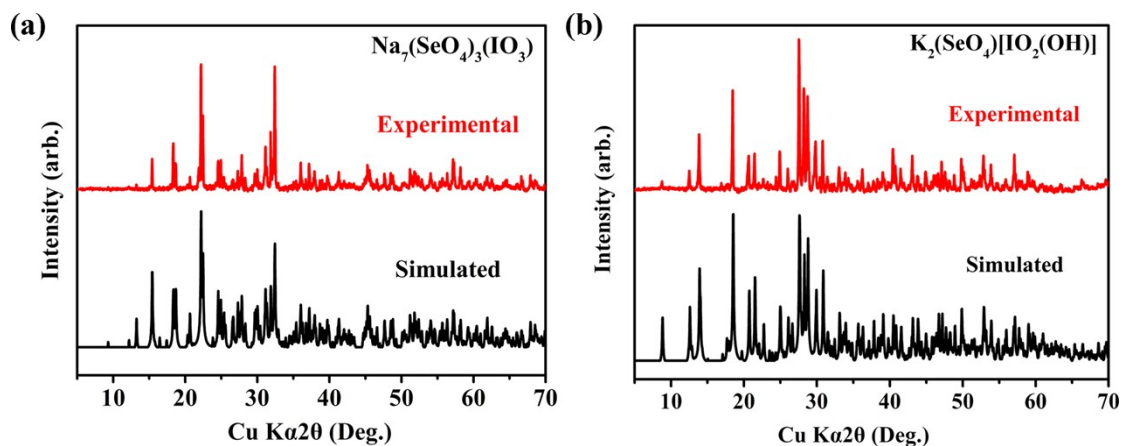

**Fig. S2** XRD patterns of (a) Na<sub>7</sub>(SeO<sub>4</sub>)<sub>3</sub>(IO<sub>3</sub>) and (b) K<sub>2</sub>(SeO<sub>4</sub>)[IO<sub>2</sub>(OH)].

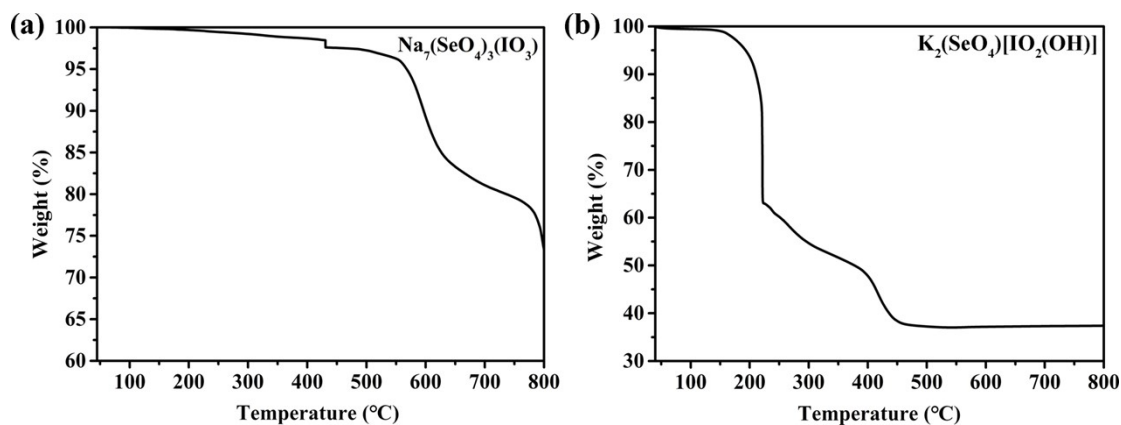

**Fig. S3** TGA curves for (a) Na<sub>7</sub>(SeO<sub>4</sub>)<sub>3</sub>(IO<sub>3</sub>) and (b) K<sub>2</sub>(SeO<sub>4</sub>)[IO<sub>2</sub>(OH)].



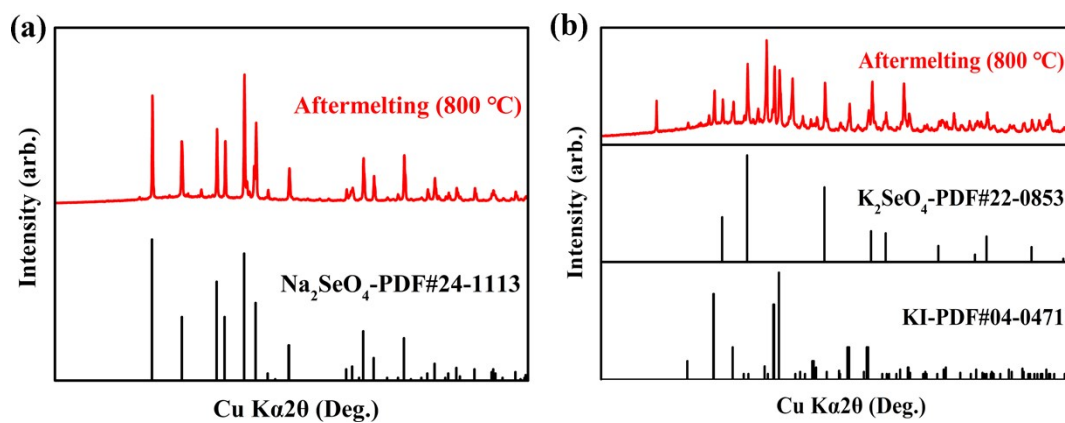

Fig. S4 XRD patterns of (a)  $\text{Na}_7(\text{SeO}_4)_3(\text{IO}_3)$  and (b)  $\text{K}_2(\text{SeO}_4)[\text{IO}_2(\text{OH})]$  after melting.

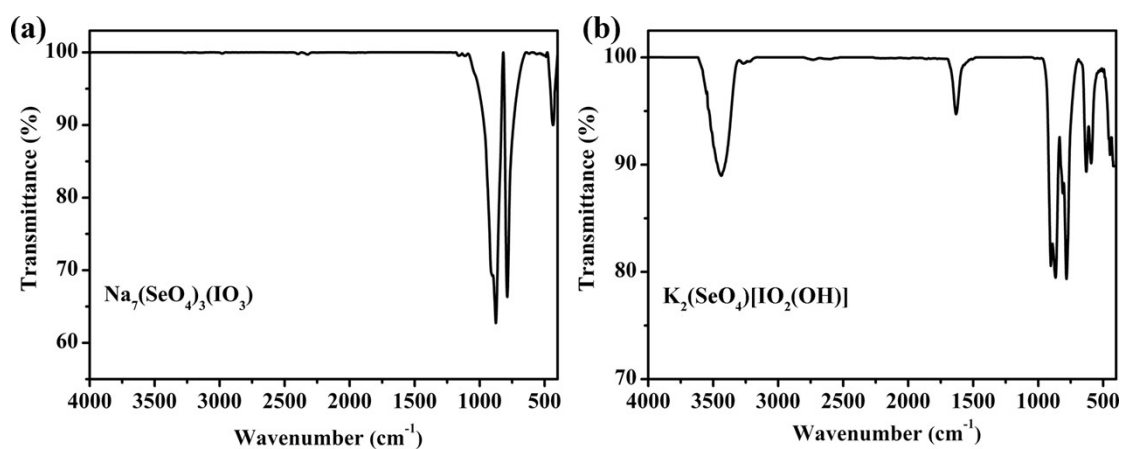

Fig. S5 IR spectra of (a)  $\text{Na}_7(\text{SeO}_4)_3(\text{IO}_3)$  and (b)  $\text{K}_2(\text{SeO}_4)[\text{IO}_2(\text{OH})]$ .

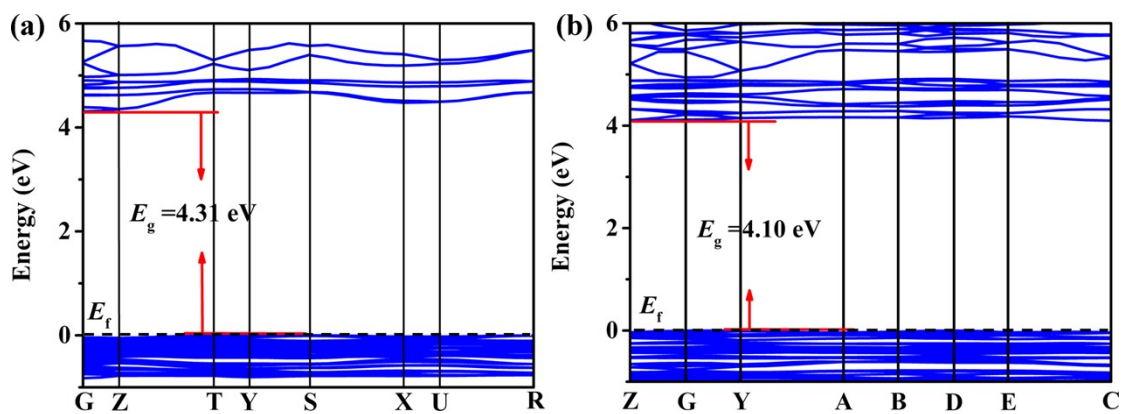

Fig. S6 Calculated band gaps of (a)  $\text{Na}_7(\text{SeO}_4)_3(\text{IO}_3)$  and (b)  $\text{K}_2(\text{SeO}_4)[\text{IO}_2(\text{OH})]$ .
